# Supplementary material for: Food Retail Environments in Greater Melbourne 2008–2016: Longitudinal Analysis of Intra-City Variation in Density and Healthiness of Food Outlets
Source: Int J Environ Res Public Health. 2020 Feb 19;17(4):1321. doi: 10.3390/ijerph17041321 (PMC7068484; doi:10.3390/ijerph17041321)
Supplement: Supplementary file 1 [file ijerph-17-01321-s001.pdf]

**Supplementary Table 1. Classifications extracted from Yellow and White Pages**

| Yellow Pages Directory Classifications                                                                                                                                                                                                                                                                                                                                                                                           | White Pages - Business Directory*                                                                                                                                            |
|----------------------------------------------------------------------------------------------------------------------------------------------------------------------------------------------------------------------------------------------------------------------------------------------------------------------------------------------------------------------------------------------------------------------------------|------------------------------------------------------------------------------------------------------------------------------------------------------------------------------|
| Bakers<br>Butchers retail<br>Cafes<br>Cakes & pastry shops<br>Chocolate & Cocoa<br>Confectionary retail<br>Delicatessens<br>Fish & seafood retail<br>Food & /or general stores<br>Fruiterers & greengrocers<br>Halal products<br>Health foods & products<br>Hotels-pubs<br>Ice-cream retail<br>Kosher products<br>Organic products<br>Restaurants<br>Pizza<br>Poultry retail<br>Supermarkets & grocery stores<br>Take away foods | ALDI<br>Coffee Club<br>Coles Express<br>Domino's<br>Gloria Jeans<br>Hungry Jacks<br>Kmart<br>McDonald's<br>NQR<br>Safeway/Woolworths<br>Target<br>The Reject Shop<br>Wendy's |

\*Food outlets with subheadings were identified and extracted from the White Pages

**Supplementary Table 2: Food outlet descriptions and healthiness scores**

| Food outlet type                    | Description                                                                                                                                                                                                                                                                                                      | Health Score |
|-------------------------------------|------------------------------------------------------------------------------------------------------------------------------------------------------------------------------------------------------------------------------------------------------------------------------------------------------------------|--------------|
| Fruiterer & greengrocer             | Mainly engaged in the sale of fresh fruit and vegetables; including wholesale stores with direct to public sales                                                                                                                                                                                                 | 10           |
| Fish shop                           | Mainly engaged in the sale of fresh seafood; including wholesale stores with direct to public sales and takeaway stores also providing a range of fresh seafood.                                                                                                                                                 | 9            |
| Poultry shop                        | Mainly engaged in the sale of fresh poultry; including wholesale stores and with direct to public sales.                                                                                                                                                                                                         | 9            |
| Butchery                            | Mainly engaged in the sale of fresh meat; including wholesale stores with direct to public sales.                                                                                                                                                                                                                | 9            |
| Major Supermarket                   | Mainly engaged in the sale of groceries (fresh foods, canned and packaged foods, dry goods) of non-specialised (conventional) food lines. May contain a butcher or baker. Usually have 5 or more checkouts and a floor area over 1000 square meters. I.e. Woolworths, Coles, BI-LO, Franklins (no frills), ALDI  | 5            |
| Minor Supermarket                   | Mainly engaged in the sale of groceries (fresh foods, canned and packaged food, dry goods) of non-specialised (conventional) food lines. Usually have 4 or fewer checkouts and a floor area under 1000 square meters. E.g. Independent grocer or supermarket.                                                    | 5            |
| Specialty food stores – core foods  | Mainly engaged in the sale of a limited line of specialised food such as a particular gourmet food that can be defined under core food.                                                                                                                                                                          | 5            |
| Restaurant/café – franchise         | E.g. franchise restaurants and cafes; mainly engaged in the preparation and sale of meals/snacks for consumption on the premises; table service provided; may sell alcohol with food; may provide takeaway services.                                                                                             | 0            |
| Restaurant/café – local independent | e.g. restaurant in a golf club, culture-based restaurant/café which is not a take-away such as Mexican, Thai, Chinese etc. ; mainly engaged in the preparation and sale of meals/snacks for consumption on the premises; table service provided; may also sell alcohol with food, may provide takeaway services. | 0            |
| Sandwich shop                       | Mainly engaged in the preparation of filled bread products like sandwiches or rolls.                                                                                                                                                                                                                             | 5            |
| Salad/sushi bar                     | Mainly engaged in the preparation of salads and sushi.                                                                                                                                                                                                                                                           | 5            |
| Delicatessen                        | Mainly engaged in the sale of specialty packaged or fresh products such as cured meats and sausage, pickled vegetables, dips, bread and olives; may also provide dine in meals.                                                                                                                                  | 0            |
| Bakery                              | Mainly oriented towards bread, biscuits, pastries or other flour products with or without packaging.                                                                                                                                                                                                             | 0            |
| General store                       | Mainly engaged in the sale of a limited line of groceries generally includes milk, bread and canned and packaged foods.                                                                                                                                                                                          | -5           |
| Specialty food store – extra foods  | Mainly engaged in the sale of foods such as ice-creams, donuts, waffles, cakes etc. than can be defined under extra food.                                                                                                                                                                                        | -8           |
| Pub                                 | e.g. pub within a bowling park, pub inside a private gambling club; food primarily engaged in selling alcoholic beverages where consumers can order and consume the alcoholic drinks in premises; can also be part of park or private club.                                                                      | -5           |
| Take-away local independent         | E.g. kebab, fish & chips, burger, chicken shops, local pizza, mainly engaged in the preparation and sale of meals/snacks that are ready for immediate consumption; table service not provided; meals can be eaten on site; taken away or delivered; shop is not a franchise.                                     | -8           |

|                           |                                                                                                                                                                                                                                                                                                                                                     |     |
|---------------------------|-----------------------------------------------------------------------------------------------------------------------------------------------------------------------------------------------------------------------------------------------------------------------------------------------------------------------------------------------------|-----|
| Take-away franchise store | E.g. McDonalds, KFC, Subway; mainly engaged in the preparation and sale of meals (excludes donuts, drinks, ice-cream etc.)/snacks that are ready for immediate consumption; table service not provided; meal can be eaten on site, taken away or delivered; the food shop is a franchise/chain store with food being sold in specialised packaging. | -10 |
|---------------------------|-----------------------------------------------------------------------------------------------------------------------------------------------------------------------------------------------------------------------------------------------------------------------------------------------------------------------------------------------------|-----|

Source: adapted from **Moayyed et al. 2017**<sup>(22)</sup>

**Supplementary Table 3. Local government area classification by distance from the Central Business District in Melbourne, Australia**

| Local government area classification by distance to CBD |                               |                                                                                                                                 |
|---------------------------------------------------------|-------------------------------|---------------------------------------------------------------------------------------------------------------------------------|
| LGA-Ring classification                                 | Approximate distance from CBD | Local Government Area <sup>#</sup>                                                                                              |
| <b>Inner</b>                                            | <15km                         | Glen Eira, Maribyrnong, Melbourne (excluding CBD), Port Phillip, Stonington, Yarra                                              |
| <b>Middle</b>                                           | 15- 25km                      | Banyule, Bayside, Boroondara, Brimbank, Darebin, Hobsons Bay, Kingston, Manningham, Monash, Moonee Valley, Moreland, Whitehorse |
| <b>Outer</b>                                            | 25-55km                       | Frankston, Dandenong, Knox, Maroondah, Manningham, Nillumbik, Yarra Ranges                                                      |
| <b>Growth Areas<sup>#</sup></b>                         | 30-70km                       | Casey, Cardinia, Hume, Melton, Whittlesea, Wyndham                                                                              |

Acronym: CBD: Central Business District, Growth Areas:

Victorian Growth Areas are local government areas designated by state government to house new population growth

Supplementary Table 4. Density of food outlets types and food outlet healthiness groups (Healthy, Less Healthy, Unhealthy) and ratio of Unhealthy, Less Healthy to Healthy food outlets across geographical areas in Greater Melbourne, Australia, 2008-2016

| Food outlet group/type                     | LGA-Ring     | Year               |                    |                    |                    |
|--------------------------------------------|--------------|--------------------|--------------------|--------------------|--------------------|
|                                            |              | 2008               | 2012               | 2014               | 2016               |
|                                            |              | Mean (95%CI)       | Mean (95%CI)       | Mean (95%CI)       | Mean (95%CI)       |
| Density Healthy food outlets               | Inner        | 6.34(4.2,8.48)     | 7.31(5.93,8.69)    | 7.8(5.77,9.83)     | 7.58(5.69,9.47)    |
|                                            | Middle       | 4.91(4.29,5.54)    | 5.53(5.08,5.98)    | 6.39(5.75,7.04)    | 6.19(5.61,6.78)    |
|                                            | Outer        | 3.71(2.2,5.21)     | 4.29(2.65,5.94)    | 5.21(3.42,7)       | 4.82(3.1,6.55)     |
|                                            | Growth Areas | 2.03(1.17,2.88)    | 2.62(1.48,3.77)    | 3.63(2.64,4.62)    | 3.28(2.26,4.3)     |
| Density Less Healthy food outlets          | Inner        | 61.66(33.82,89.51) | 61.22(36.45,86)    | 60.82(37.46,84.19) | 60.56(38.17,82.96) |
|                                            | Middle       | 24.08(19.98,28.18) | 25.27(21.63,28.9)  | 27.19(23.35,31.03) | 27.89(23.77,32.01) |
|                                            | Outer        | 16.49(10.93,22.05) | 17.6(11.75,23.44)  | 18.56(12.48,24.65) | 19.08(12.95,25.22) |
|                                            | Growth Areas | 9.15(5.42,12.88)   | 9.18(4.79,13.57)   | 10.86(7.71,14)     | 10.61(7.51,13.71)  |
| Density Unhealthy food outlets             | Inner        | 43.14(28.37,57.9)  | 48.07(36.6,59.53)  | 47.05(35.52,58.58) | 46.59(34.79,58.4)  |
|                                            | Middle       | 31.79(28.29,35.28) | 32.73(29.38,36.07) | 36.03(32.4,39.67)  | 37.17(32.94,41.4)  |
|                                            | Outer        | 27.3(16.4,38.2)    | 27.08(16.29,37.87) | 30.51(18.07,42.96) | 31.28(18.65,43.9)  |
|                                            | Growth Areas | 19.36(10.15,28.58) | 19.88(9.74,30.02)  | 23.98(16.78,31.19) | 24.23(17.74,30.72) |
| Ratio Unhealthy to Healthy food outlets    | Inner        | 7.02(4.89,9.15)    | 6.61(5.32,7.9)     | 6.13(5.01,7.25)    | 6.22(5.09,7.35)    |
|                                            | Middle       | 6.69(5.6,7.79)     | 5.98(5.27,6.69)    | 5.75(4.99,6.51)    | 6.07(5.34,6.81)    |
|                                            | Outer        | 7.52(6.5,8.54)     | 6.26(5.18,7.34)    | 5.6(4.02,7.18)     | 6.26(4.39,8.13)    |
|                                            | Growth Areas | 9.15(5.31,12.99)   | 7.18(5.66,8.71)    | 6.59(5.79,7.39)    | 7.52(6.74,8.31)    |
| Ratio Less Healthy to Healthy food outlets | Inner        | 10.8(3.6,18.01)    | 8.49(4.77,12.22)   | 8.11(4.62,11.59)   | 8.16(5.31,11.01)   |
|                                            | Middle       | 4.95(4.2,5.69)     | 4.59(3.91,5.28)    | 4.3(3.68,4.92)     | 4.52(3.89,5.15)    |
|                                            | Outer        | 4.79(3.89,5.69)    | 4.29(3.68,4.9)     | 3.54(3.4,0.9)      | 3.96(3.36,4.57)    |
|                                            | Growth Areas | 4.6(4.03,5.18)     | 3.46(3.11,3.81)    | 3.02(2.46,3.58)    | 3.36(2.39,4.34)    |
| Small Goods                                | Inner        | 1.41(0.88,1.94)    | 1.23(0.85,1.61)    | 1.23(0.84,1.62)    | 1.18(0.82,1.53)    |
|                                            | Middle       | 0.86(0.61,1.12)    | 0.83(0.59,1.08)    | 0.85(0.62,1.08)    | 0.86(0.62,1.09)    |
|                                            | Outer        | 0.65(0.38,0.93)    | 0.65(0.38,0.92)    | 0.69(0.44,0.94)    | 0.7(0.44,0.97)     |
|                                            | Growth Areas | 0.48(0.24,0.73)    | 0.41(0.21,0.6)     | 0.41(0.23,0.59)    | 0.39(0.21,0.57)    |

|                            |                     |                 |                 |                  |                 |
|----------------------------|---------------------|-----------------|-----------------|------------------|-----------------|
| <b>Fresh Produce</b>       | <b>Inner</b>        | 0.86(0.62,1.11) | 0.79(0.57,1.01) | 0.88(0.64,1.11)  | 1.02(0.78,1.26) |
|                            | <b>Middle</b>       | 0.72(0.56,0.87) | 0.7(0.56,0.84)  | 0.78(0.63,0.93)  | 0.82(0.66,0.98) |
|                            | <b>Outer</b>        | 0.5(0.35,0.66)  | 0.45(0.31,0.59) | 0.56(0.39,0.72)  | 0.55(0.36,0.75) |
|                            | <b>Growth Areas</b> | 0.34(0.23,0.44) | 0.34(0.22,0.45) | 0.39(0.28,0.51)  | 0.32(0.2,0.44)  |
| <b>Discretionary Foods</b> | <b>Inner</b>        | 1.93(1.51,2.35) | 1.81(1.49,2.13) | 1.78(1.32,2.24)  | 1.69(1.29,2.08) |
|                            | <b>Middle</b>       | 1.3(1.16,1.43)  | 1.28(1.11,1.44) | 1.44(1.31,1.58)  | 1.48(1.3,1.67)  |
|                            | <b>Outer</b>        | 1.21(0.87,1.55) | 1.16(0.78,1.53) | 1.33(0.92,1.73)  | 1.33(0.95,1.71) |
|                            | <b>Growth Areas</b> | 0.87(0.58,1.15) | 0.88(0.69,1.06) | 0.91(0.62,1.2)   | 0.95(0.69,1.21) |
| <b>Supermarkets</b>        | <b>Inner</b>        | 1.03(0.51,1.54) | 1.24(0.78,1.7)  | 1.23(0.78,1.68)  | 1.23(0.76,1.69) |
|                            | <b>Middle</b>       | 0.79(0.54,1.04) | 1.11(0.93,1.29) | 1.17(0.99,1.34)  | 1.23(1.03,1.43) |
|                            | <b>Outer</b>        | 0.72(0.38,1.05) | 0.96(0.67,1.24) | 1.07(0.8,1.34)   | 1.09(0.79,1.38) |
|                            | <b>Growth Areas</b> | 0.39(0.25,0.53) | 0.59(0.43,0.75) | 0.83(0.73,0.93)  | 0.84(0.67,1)    |
| <b>Eating Out</b>          | <b>Inner</b>        | 9.4(2.56,16.24) | 9.75(3.11,16.4) | 9.61(3.11,16.11) | 9.7(3.16,16.24) |
|                            | <b>Middle</b>       | 3.25(1.77,4.74) | 3.44(1.93,4.95) | 3.74(2.11,5.36)  | 3.86(2.14,5.59) |
|                            | <b>Outer</b>        | 2.41(1.02,3.81) | 2.57(1.07,4.07) | 2.64(1.12,4.16)  | 2.87(1.2,4.55)  |
|                            | <b>Growth Areas</b> | 1.16(0.48,1.84) | 1.21(0.46,1.96) | 1.46(0.69,2.22)  | 1.45(0.64,2.26) |
| <b>Fast-food</b>           | <b>Inner</b>        | 1.08(0.67,1.49) | 1.56(1.03,2.08) | 1.7(1.18,2.22)   | 1.67(1.22,2.12) |
|                            | <b>Middle</b>       | 1.02(0.77,1.28) | 1.28(1.02,1.53) | 1.65(1.34,1.97)  | 1.76(1.42,2.11) |
|                            | <b>Outer</b>        | 1.04(0.55,1.52) | 1.41(0.81,2.01) | 1.69(0.93,2.45)  | 1.74(0.96,2.53) |
|                            | <b>Growth Areas</b> | 1.12(0.78,1.47) | 1.16(0.61,1.72) | 1.44(1.01,1.87)  | 1.43(0.99,1.88) |
| <b>Takeaways</b>           | <b>Inner</b>        | 7.14(4.69,9.59) | 7.89(6.51,9.26) | 7.54(5.97,9.11)  | 7.51(5.99,9.03) |
|                            | <b>Middle</b>       | 6.2(5.28,7.12)  | 6.25(5.51,6.98) | 6.52(5.66,7.38)  | 6.66(5.77,7.55) |
|                            | <b>Outer</b>        | 5.06(2.76,7.35) | 4.75(2.78,6.72) | 5.11(2.97,7.25)  | 5.33(3.15,7.51) |
|                            | <b>Growth Areas</b> | 3.6(1.8,5.4)    | 3.49(1.52,5.45) | 4.06(2.93,5.19)  | 4.05(3.15,4.95) |

**Supplementary Table 5. Pairwise comparisons for liner mixed model without interaction for food outlets types, food outlets grouped by healthiness and ratio of Healthy and Less Healthy to Healthy outlet over time and across local government area rings, Melbourne, Australia, 2008-2016**

|                                                                                                                           | Density Healthy           | Density Less Healthy         | Ratio Unhealthy to Healthy | Ratio Less Healthy to Healthy | Small Goods               | Eating Out                | Discretionary Foods       | Fresh Produce             | Supermarkets              | Takeaways                 |
|---------------------------------------------------------------------------------------------------------------------------|---------------------------|------------------------------|----------------------------|-------------------------------|---------------------------|---------------------------|---------------------------|---------------------------|---------------------------|---------------------------|
|                                                                                                                           | Contrast (95%CI)          | Contrast (95%CI)             | Contrast (95%CI)           | Contrast (95%CI)              | Contrast (95%CI)          | Contrast (95%CI)          | Contrast (95%CI)          | Contrast (95%CI)          | Contrast (95%CI)          | Contrast (95%CI)          |
| Within LGA-Ring mean density of food outlet: linear mixed model without interaction pairwise comparisons Sidak's adjusted |                           |                              |                            |                               |                           |                           |                           |                           |                           |                           |
| Middle vs Inner                                                                                                           | -1.5(-3.09,0.09)          | <b>-34.96(-48.6,-21.32)</b>  | -0.37(-1.89,1.15)          | <b>-4.3(-6.53,-2.07)</b>      | <b>-0.4(-0.65,-0.15)</b>  | <b>-6.04(-8.57,-3.52)</b> | -0.43(-0.93,0.07)         | -0.13(-0.35,0.08)         | -0.1(-0.41,0.21)          | -1.11(-3.1,0.88)          |
| Outer vs Inner                                                                                                            | <b>-2.75(-4.52,-0.98)</b> | <b>-43.14(-58.31,-27.96)</b> | -0.09(-1.78,1.6)           | <b>-4.75(-7.23,-2.27)</b>     | <b>-0.58(-0.86,-0.3)</b>  | <b>-6.99(-9.86,-4.13)</b> | <b>-0.55(-1.1,0.01)</b>   | <b>-0.37(-0.61,-0.13)</b> | -0.22(-0.57,0.12)         | <b>-2.46(-4.68,-0.25)</b> |
| Growth Areas vs Inner                                                                                                     | <b>-4.37(-6.2,-2.53)</b>  | <b>-51.12(-66.87,-35.37)</b> | 1.12(-0.64,2.87)           | <b>-5.28(-7.85,-2.71)</b>     | <b>-0.84(-1.13,-0.54)</b> | <b>-8.3(-11.21,-5.39)</b> | <b>-0.94(-1.53,-0.36)</b> | <b>-0.55(-0.8,-0.3)</b>   | <b>-0.52(-0.88,-0.16)</b> | <b>-3.72(-6.02,-1.42)</b> |
| Outer vs Middle                                                                                                           | -1.25(-2.76,0.26)         | -8.17(-21.15,4.8)            | 0.28(-1.16,1.73)           | -0.44(-2.56,1.68)             | -0.18(-0.42,0.07)         | -0.95(-3.42,1.52)         | -0.12(-0.6,0.36)          | <b>-0.24(-0.45,-0.04)</b> | -0.12(-0.42,0.17)         | -1.35(-3.24,0.55)         |
| Growth Areas vs Middle                                                                                                    | <b>-2.87(-4.46,-1.28)</b> | <b>-16.16(-29.8,-2.52)</b>   | 1.49(-0.03,3.01)           | -0.98(-3.2,1.25)              | <b>-0.43(-0.69,-0.17)</b> | -2.25(-4.78,0.27)         | <b>-0.52(-1.02,-0.01)</b> | <b>-0.42(-0.63,-0.2)</b>  | <b>-0.41(-0.72,-0.1)</b>  | <b>-2.61(-4.6,-0.62)</b>  |
| Growth Areas vs Middle                                                                                                    | -1.62(-3.39,0.15)         | -7.98(-23.16,7.19)           | 1.2(-0.49,2.89)            | -0.53(-3.01,1.95)             | -0.25(-0.54,0.04)         | -1.3(-4.17,1.56)          | -0.4(-0.96,0.16)          | -0.17(-0.42,0.07)         | -0.29(-0.64,0.05)         | -1.26(-3.48,0.95)         |

| Within Year mean density of food outlet: linear mixed model without interaction pairwise comparisons Sidak's adjusted |                        |                        |                           |                           |                   |                  |                   |                   |                        |                       |
|-----------------------------------------------------------------------------------------------------------------------|------------------------|------------------------|---------------------------|---------------------------|-------------------|------------------|-------------------|-------------------|------------------------|-----------------------|
| 2012 vs 2008                                                                                                          | <b>0.67(0.38,0.96)</b> | 0.63(-1.2,2.46)        | <b>-1.02(-1.71,-0.33)</b> | <b>-0.92(-1.67,-0.16)</b> | -0.06(-0.33,0.2)  | 0.18(-2.41,2.78) | -0.04(-0.21,0.12) | -0.03(-0.18,0.11) | <b>0.26(0.04,0.49)</b> | 0.07(-0.29,0.43)      |
| 2014 vs 2008                                                                                                          | <b>1.5(1.22,1.79)</b>  | <b>1.84(0.01,3.67)</b> | <b>-1.47(-2.16,-0.78)</b> | <b>-1.36(-2.12,-0.61)</b> | -0.04(-0.31,0.22) | 0.34(-2.25,2.93) | 0.08(-0.08,0.24)  | 0.05(-0.09,0.2)   | <b>0.36(0.14,0.58)</b> | 0.3(-0.06,0.67)       |
| 2016 vs 2008                                                                                                          | <b>1.23(0.94,1.52)</b> | <b>2.13(0.3,3.96)</b>  | <b>-0.99(-1.69,-0.3)</b>  | <b>-1.1(-1.86,-0.35)</b>  | -0.05(-0.32,0.21) | 0.45(-2.14,3.05) | 0.08(-0.08,0.24)  | 0.08(-0.07,0.23)  | <b>0.39(0.16,0.61)</b> | <b>0.4(0.04,0.76)</b> |
| 2014 vs 2012                                                                                                          | <b>0.83(0.54,1.12)</b> | 1.21(-0.62,3.04)       | -0.45(-1.14,0.24)         | -0.44(-1.2,0.31)          | 0.02(-0.24,0.27)  | 0.15(-2.43,2.74) | 0.12(-0.04,0.28)  | 0.09(-0.06,0.23)  | 0.09(-0.13,0.31)       | 0.23(-0.13,0.59)      |
| 2016 vs 2012                                                                                                          | <b>0.56(0.27,0.85)</b> | 1.5(-0.33,3.33)        | 0.03(-0.67,0.72)          | -0.19(-0.94,0.57)         | 0.01(-0.25,0.27)  | 0.27(-2.32,2.86) | 0.13(-0.04,0.29)  | 0.12(-0.04,0.27)  | 0.12(-0.1,0.34)        | 0.33(-0.03,0.69)      |
| 2016 vs 2014                                                                                                          | -0.28(-0.57,0.01)      | 0.29(-1.54,2.12)       | 0.47(-0.22,1.17)          | 0.26(-0.5,1.01)           | -0.01(-0.27,0.25) | 0.11(-2.47,2.7)  | 0(-0.16,0.16)     | 0.03(-0.12,0.18)  | 0.03(-0.19,0.25)       | 0.1(-0.27,0.46)       |

Bold = results significant p≤0.05

**Supplementary Table 6. Pairwise comparisons for liner mixed model with interaction for Unhealthy food outlets over time across local government area rings, Melbourne, Australia, 2008-2016**

| Within Year, LGA-Ring comparison |                        |                       |         | Within LGA-Ring, Year comparison |                 |                   |         |
|----------------------------------|------------------------|-----------------------|---------|----------------------------------|-----------------|-------------------|---------|
| Year                             | LGA-RING comparison    | Contrast (95% CI)     | P value | LGA-Ring                         | Year comparison | Contrast (95% CI) | P Value |
| 2008                             | Middle vs Inner        | -11.35(-22.83,0.13)   | 0.054   | Inner                            | 2012 vs 2008    | 4.93(1.8,8.06)    | 0.000   |
|                                  | Outer vs Inner         | -15.84(-28.61,-3.06)  | 0.007   |                                  | 2014 vs 2008    | 3.91(0.78,7.04)   | 0.006   |
|                                  | Growth Areas vs Inner  | -23.77(-37.03,-10.52) | 0.000   |                                  | 2016 vs 2008    | 3.46(0.32,6.59)   | 0.022   |
|                                  | Outer vs Middle        | -4.49(-15.4,6.43)     | 0.860   |                                  | 2014 vs 2012    | -1.02(-4.15,2.11) | 0.950   |
|                                  | Growth Areas vs Middle | -12.42(-23.9,-0.94)   | 0.026   |                                  | 2016 vs 2012    | -1.47(-4.61,1.66) | 0.767   |
|                                  | Growth Areas vs Outer  | -7.94(-20.71,4.84)    | 0.476   |                                  | 2016 vs 2014    | -0.46(-3.59,2.68) | 0.999   |
| 2012                             | Middle vs Inner        | -15.34(-26.82,-3.86)  | 0.003   | Middle                           | 2012 vs 2008    | 0.94(-1.27,3.15)  | 0.841   |
|                                  | Outer vs Inner         | -20.99(-33.76,-8.21)  | 0.000   |                                  | 2014 vs 2008    | 4.24(2.03,6.46)   | 0.000   |
|                                  | Growth Areas vs Inner  | -28.19(-41.45,-14.94) | 0.000   |                                  | 2016 vs 2008    | 5.38(3.17,7.59)   | 0.000   |
|                                  | Outer vs Middle        | -5.65(-16.57,5.27)    | 0.682   |                                  | 2014 vs 2012    | 3.3(1.09,5.52)    | 0.001   |
|                                  | Growth Areas vs Middle | -12.85(-24.33,-1.37)  | 0.019   |                                  | 2016 vs 2012    | 4.44(2.23,6.65)   | 0.000   |
|                                  | Growth Areas vs Outer  | -7.2(-19.98,5.57)     | 0.589   |                                  | 2016 vs 2014    | 1.14(-1.08,3.35)  | 0.689   |
| 2014                             | Middle vs Inner        | -11.02(-22.5,0.46)    | 0.067   | Outer                            | 2012 vs 2008    | -0.22(-3.12,2.68) | 1.000   |
|                                  | Outer vs Inner         | -16.53(-29.31,-3.76)  | 0.004   |                                  | 2014 vs 2008    | 3.21(0.31,6.11)   | 0.021   |
|                                  | Growth Areas vs Inner  | -23.06(-36.32,-9.81)  | 0.000   |                                  | 2016 vs 2008    | 3.97(1.07,6.87)   | 0.002   |
|                                  | Outer vs Middle        | -5.52(-16.43,5.4)     | 0.704   |                                  | 2014 vs 2012    | 3.43(0.53,6.33)   | 0.011   |

|      |                        |                      |       |        |              |                  |       |
|------|------------------------|----------------------|-------|--------|--------------|------------------|-------|
|      | Growth Areas vs Middle | -12.05(-23.53,-0.57) | 0.034 |        | 2016 vs 2012 | 4.2(1.3,7.09)    | 0.001 |
|      | Growth Areas vs Outer  | -6.53(-19.3,6.24)    | 0.693 |        | 2016 vs 2014 | 0.76(-2.14,3.66) | 0.982 |
| 2016 | Middle vs Inner        | -9.43(-20.9,2.05)    | 0.171 | Growth | 2012 vs 2008 | 0.51(-2.62,3.64) | 0.999 |
|      | Outer vs Inner         | -15.32(-28.09,-2.55) | 0.010 |        | 2014 vs 2008 | 4.62(1.49,7.75)  | 0.001 |
|      | Growth Areas vs Inner  | -22.37(-35.62,-9.11) | 0.000 |        | 2016 vs 2008 | 4.86(1.73,7.99)  | 0.000 |
|      | Outer vs Middle        | -5.89(-16.81,5.03)   | 0.638 |        | 2014 vs 2012 | 4.11(0.98,7.24)  | 0.003 |
|      | Growth Areas vs Middle | -12.94(-24.42,-1.46) | 0.018 |        | 2016 vs 2012 | 4.35(1.22,7.48)  | 0.002 |
|      | Growth Areas vs Outer  | -7.05(-19.82,5.72)   | 0.613 |        | 2016 vs 2014 | 0.24(-2.89,3.37) | 1.000 |

**Supplementary Table 7. Pairwise comparisons for liner mixed model with interaction for Fast-food outlets over time across local government area rings, Melbourne, Australia, 2008-2016**

| Within Year, LGA-Ring comparison |                        |                   |         | Within LGA-Ring, Year comparison |                 |                   |         |
|----------------------------------|------------------------|-------------------|---------|----------------------------------|-----------------|-------------------|---------|
| Year                             | LGA_RING comparison    | Contrast (95% CI) | P value | LGA-Ring                         | Year comparison | Contrast (95% CI) | P value |
| 2008                             | Middle vs Inner        | -0.06(-0.71,0.59) | 1.000   | Inner                            | 2012 vs 2008    | 0.48(0.24,0.71)   | 0.000   |
|                                  | Outer vs Inner         | -0.04(-0.77,0.68) | 1.000   |                                  | 2014 vs 2008    | 0.62(0.39,0.86)   | 0.000   |
|                                  | Growth Areas vs Inner  | -0.1(-0.85,0.66)  | 1.000   |                                  | 2016 vs 2008    | 0.59(0.36,0.83)   | 0.000   |
|                                  | Outer vs Middle        | 0.01(-0.61,0.63)  | 1.000   |                                  | 2014 vs 2012    | 0.14(-0.09,0.38)  | 0.484   |
|                                  | Growth Areas vs Middle | -0.04(-0.69,0.62) | 1.000   |                                  | 2016 vs 2012    | 0.12(-0.12,0.35)  | 0.731   |
|                                  | Growth Areas vs Outer  | -0.05(-0.78,0.68) | 1.000   |                                  | 2016 vs 2014    | -0.03(-0.26,0.21) | 1.000   |
| 2012                             | Middle vs Inner        | -0.28(-0.93,0.37) | 0.831   | Middle                           | 2012 vs 2008    | 0.25(0.08,0.42)   | 0.000   |
|                                  | Outer vs Inner         | -0.14(-0.86,0.58) | 0.996   |                                  | 2014 vs 2008    | 0.63(0.46,0.79)   | 0.000   |
|                                  | Growth Areas vs Inner  | -0.39(-1.14,0.36) | 0.670   |                                  | 2016 vs 2008    | 0.74(0.57,0.91)   | 0.000   |
|                                  | Outer vs Middle        | 0.14(-0.48,0.76)  | 0.992   |                                  | 2014 vs 2012    | 0.38(0.21,0.54)   | 0.000   |
|                                  | Growth Areas vs Middle | -0.11(-0.76,0.54) | 0.998   |                                  | 2016 vs 2012    | 0.49(0.32,0.65)   | 0.000   |
|                                  | Growth Areas vs Outer  | -0.25(-0.97,0.47) | 0.933   |                                  | 2016 vs 2014    | 0.11(-0.05,0.28)  | 0.376   |
| 2014                             | Middle vs Inner        | -0.05(-0.7,0.6)   | 1.000   | Outer                            | 2012 vs 2008    | 0.38(0.16,0.59)   | 0.000   |
|                                  | Outer vs Inner         | -0.01(-0.73,0.71) | 1.000   |                                  | 2014 vs 2008    | 0.65(0.44,0.87)   | 0.000   |
|                                  | Growth Areas vs Inner  | -0.26(-1.01,0.49) | 0.934   |                                  | 2016 vs 2008    | 0.71(0.49,0.93)   | 0.000   |
|                                  | Outer vs Middle        | 0.04(-0.58,0.66)  | 1.000   |                                  | 2014 vs 2012    | 0.28(0.06,0.49)   | 0.005   |
|                                  | Growth Areas vs Middle | -0.21(-0.86,0.44) | 0.951   |                                  | 2016 vs 2012    | 0.33(0.11,0.55)   | 0.000   |
|                                  | Growth Areas vs Outer  | -0.25(-0.97,0.48) | 0.936   |                                  | 2016 vs 2014    | 0.05(-0.16,0.27)  | 0.985   |
| 2016                             | Middle vs Inner        | 0.09(-0.56,0.74)  | 0.999   | Growth                           | 2012 vs 2008    | 0.18(-0.07,0.43)  | 0.314   |
|                                  | Outer vs Inner         | 0.07(-0.65,0.8)   | 1.000   |                                  | 2014 vs 2008    | 0.46(0.21,0.71)   | 0.000   |
|                                  | Growth Areas vs Inner  | -0.24(-0.99,0.51) | 0.955   |                                  | 2016 vs 2008    | 0.45(0.2,0.7)     | 0.000   |
|                                  | Outer vs Middle        | -0.02(-0.64,0.6)  | 1.000   |                                  | 2014 vs 2012    | 0.28(0.04,0.51)   | 0.011   |
|                                  | Growth Areas vs Middle | -0.33(-0.98,0.32) | 0.697   |                                  | 2016 vs 2012    | 0.27(0.04,0.51)   | 0.015   |
|                                  | Growth Areas vs Outer  | -0.31(-1.03,0.41) | 0.833   |                                  | 2016 vs 2014    | -0.01(-0.24,0.23) | 1.000   |
